# Supplementary material for: Enhancing the potential of phenomic and genomic prediction in winter wheat breeding using high-throughput phenotyping and deep learning
Source: PubMed Central journal article supplement (PMC11169824; doi:10.3389/fpls.2024.1410249), 2024-05-30
Supplement: DataSheet_1.pdf [file DataSheet_1.pdf]

## Supplementary Material

### **Enhancing the Potential of Phenomic and Genomic Prediction in Winter Wheat Breeding Using High-Throughput Phenotyping and Deep Learning**

Swas Kaushal<sup>1</sup>, Harsimardeep S Gill<sup>1</sup>, Mohammad Maruf Billah<sup>2</sup>, Shahid Nawaz Khan<sup>2</sup>, Jyotirmoy Halder<sup>1</sup>, Amy Bernardo<sup>3</sup>, Paul St. Amand<sup>3</sup>, Guihua Bai<sup>3</sup>, Karl Glover<sup>1</sup>, Maitiniyazi Maimaitijiang<sup>2\*</sup>, Sunish K. Sehgal<sup>1\*</sup>

<sup>1</sup>Department of Agronomy, Horticulture and Plant Science, South Dakota State University, Brookings, SD, United States

<sup>2</sup>Department of Geography & Geospatial Sciences, Geospatial Sciences Center of Excellence, South Dakota State University, Brookings, SD, United States

<sup>3</sup>USDA-ARS, Hard Winter Wheat Genetics Research Unit, Manhattan, KS, United States

### Supplementary Tables and Figures

**Supplementary Table 1:** List of vegetation indices and equations extracted from multispectral images used in this study.

| <b>Spectral feature name</b>                                                                   | <b>Formulation</b>                                                                                                   | <b>Ref.</b>                  |
|------------------------------------------------------------------------------------------------|----------------------------------------------------------------------------------------------------------------------|------------------------------|
| 5 original reflectance bands: Blue (B), Green (G), Red (R), Red edge (RE), Near Infrared (NIR) | The reflectance value of each band                                                                                   | -                            |
| Normalized difference vegetation index                                                         | $NDVI = (NIR - R) / (NIR + R)$                                                                                       | (Rouse Jr et al., 1974)      |
| Green Normalized Difference Vegetation Index (GNDVI)                                           | $GNDVI = (NIR - G) / (NIR + G)$                                                                                      | (Gitelson & Merzlyak, 1997)  |
| Ratio Vegetation Index 1                                                                       | $RVI\_1 = NIR / R$                                                                                                   | (Richardson & Wiegand, 1977) |
| Green Chlorophyll Index                                                                        | $GCI = (NIR / G) - 1.0$                                                                                              | (Gitelson et al., 1997)      |
| Rice Growth Vegetation Index                                                                   | $RGVI = R / G$                                                                                                       | (Nuarsa et al., 1997)        |
| Difference Vegetation Index                                                                    | $DVI = NIR - R$                                                                                                      | (Tucker, 1979)               |
| Soil-Adjusted Vegetation Index                                                                 | $SAVI = ((NIR - R) / (NIR + R + L)) * (1.0 + L)$ , L =                                                               | (Huete, 1988)                |
| Modified Soil Adjusted Vegetation Index                                                        | $MSAVI = 0.5 * ((2.0 * NIR) + 1.0 - \sqrt{(2.0 * NIR + 1.0)^2 - 1.0})$                                               | (Qi et al., 1994)            |
| Optimized Soil Adjusted Vegetation Index                                                       | $OSAVI = (NIR - R) / (NIR + R + 0.16)$                                                                               | (Rondeaux et al., 1996)      |
| Renormalized Difference Vegetation Index                                                       | $RDVI = \sqrt{(NIR - R)^2} / (NIR + R)$                                                                              | (Roujean & Breon, 1995)      |
| Triangular Vegetation Index                                                                    | $TVI = 60.0 * (NIR - G) - 100.0 * (R - G)$                                                                           | (Deering, 1975)              |
| Transformed Soil Adjusted Vegetation Index                                                     | $TSAVI = (a * (NIR - a * R - b)) / (a * NIR + R - a * b)$ , a, b = 0.96916, 0.084726                                 | (Baret & Guyot, 1991)        |
| Perpendicular Vegetation Index                                                                 | $PVI = (NIR - a * R - b) / \sqrt{1 + a^2}$ , a, b =                                                                  | (Richardson & Wiegand, 1977) |
| Soil-Adjusted Vegetation Index 2                                                               | $SAVI\_2 = NIR / (R - (b/a))$ , a, b = 0.96916, 0.084726                                                             | (Huete, 1988)                |
| Adjusted Transformed Soil Adjusted Vegetation Index                                            | $ATSAVI = (a * (-a * R - b)) / (a * NIR + R - a * b + X * (1 + \sqrt{1 + a^2}))$ , a, b, X = 0.96916, 0.084726, 0.08 | (Baret & Guyot, 1991)        |
| Normalized Difference Water Index                                                              | $NDWI = (G - NIR) / (G + NIR)$                                                                                       | (McFeeters, 1996)            |
| Kawashima index                                                                                | $IKAW = (R - B) / (R + B)$                                                                                           | (Kawashima & Nakatani, 1998) |
| Simple Ratio Pigment Index                                                                     | $SRPI = B / R$                                                                                                       | (Peñuelas et al., 1995)      |

|                                                                                                      |                                                                                                             |                           |
|------------------------------------------------------------------------------------------------------|-------------------------------------------------------------------------------------------------------------|---------------------------|
| Ratio Vegetation Index 2                                                                             | $RVI\_2 = NIR/G$                                                                                            | (Pearson & Miller, 1972)  |
| Modified Chlorophyll Absorption in Reflective                                                        | $MCARI = (RE-R-0.2*(RE-G))*(RE/R)$                                                                          | (Daughtry et al., 2000)   |
| Modified Chlorophyll Absorption in Reflective                                                        | $MCARI\_1 = 1.2*(2.5*(NIR-R)-1.3*(NIR-G))$                                                                  | (Haboudane et al., 2004)  |
| Modified Chlorophyll Absorption in Reflective                                                        | $MCARI\_2 = 1.5*(2.5*(NIR-R)-1.3*(NIR-G))*(np.square(2.0*NIR+1))-(6.0*NIR-$                                 | (Haboudane et al., 2004)  |
| Modified Triangular Vegetation Index                                                                 | $MTVI\_1 = 1.2*(1.2*(NIR-G)-2.5*(R-G))$                                                                     | (Haboudane et al., 2004)  |
| Modified Triangular Vegetation Index 2                                                               | $MTVI\_2 = 1.5*(1.2*(NIR-G)-2.5*(R-G))*(np.square(2*NIR+1))-(6.0*NIR-$                                      | (Haboudane et al., 2004)  |
| Modified chlorophyll absorption ratio index/Second modified                                          | $R\_MCARI\_MTVI2 = ((RE-R-0.2*(RE-G))*(RE/R))/((1.5*(1.2*(NIR-G)-2.5*(R-G))*(np.square(2*NIR+1))-(6.0*NIR-$ | (Eitel et al., 2007)      |
| Enhanced Vegetation Index                                                                            | $EVI = (NIR-R)/(NIR+6.0*R-7.5*B+1.0)$                                                                       | (Huete et al., 1997)      |
| Datt Index                                                                                           | $DATT = (NIR-RE)/(NIR+R)$                                                                                   | (Datt, 1999)              |
| Double-peak Canopy Nitrogen Index                                                                    | $DNCI = (RE-G)/(RE+G)$                                                                                      | (Chen et al., 2010)       |
| Plant Senescence Reflectance Index                                                                   | $PSRI = (R-G)/RE$                                                                                           | (Merzlyak et al., 1999)   |
| Structure Intensive Pigment Vegetation Index                                                         | $SIPI = (NIR-B)/(NIR+R)$                                                                                    | (Peñuelas et al., 1995)   |
| Spectral Polygon Vegetation Index                                                                    | $SPVI = 0.4*3.7*(NIR-R)-1.2*np.absolute(G-R)$                                                               | (Vincini et al., 2006)    |
| Transformed Chlorophyll Absorption Reflectance Index                                                 | $TCARI = 3.0*((RE-R)-0.2*(RE-G))*(RE/R)$                                                                    | (Haboudane et al., 2002)  |
| Transformed Chlorophyll Absorption in the Reflectance Index/Optimized Soil-Adjusted Vegetation Index | $R\_TCARI\_OSAVI = (3.0*((RE-R)-0.2*(RE-G))*(RE/R))/((NIR-R)/(NIR+R+0.16))$                                 | (Haboudane et al., 2002)  |
| Red edge relative index                                                                              | $RERI = (RE-R)/NIR$                                                                                         | (Haboudane et al., 2002)  |
| Normalized difference red edge index                                                                 | $NDRE = (NIR-RE)/(NIR+RE)$                                                                                  | (Fitzgerald et al., 2010) |
| MERIS Terrestrial Chlorophyll Index                                                                  | $MTCI = (NIR-RE)/(RE-R)$                                                                                    | (Dash & Curran, 2004)     |
| Enhanced Vegetation Index 2                                                                          | $EVI\_2 = 2.5*((NIR-R)/(NIR+2.4*R+1.0))$                                                                    | (Huete et al., 1997)      |
| Red-Edge Chlorophyll Index                                                                           | $RECI = (NIR/RE)-1$                                                                                         | (Haboudane et al., 2002)  |

|                                                 |                                                     |                          |
|-------------------------------------------------|-----------------------------------------------------|--------------------------|
| Normalized excess green vegetation index        | $NEXG = (2 * G - R - B) / (G + R + B)$              | (Woebbecke et al., 1995) |
| Normalized green–red                            | $NGRDI = (G - R) / (G + R)$                         | (Tucker, 1979)           |
| Enhanced Normalized Difference Vegetation Index | $ENDVI = (NIR + G - 2.0 * B) / (NIR + G + 2.0 * B)$ | (Anchal et al., 2022)    |
| Anthocyanin Reflectance Index 2                 | $ARI\_2 = NIR * (1.0 / G) - (1.0 / RE)$             | (Gitelson et al., 2001)  |
| Carotenoid Reflectance Index 2                  | $CRI\_2 = (1.0 / G) - (1.0 / RE)$                   | (Gitelson et al., 2003)  |

**Supplementary Table 2.** Summary statistics and broad-sense heritability ( $H^2$ ) of recorded agronomic traits.

| <b>Trait</b>            | <b>Mean</b> | <b><math>H^2</math></b> |
|-------------------------|-------------|-------------------------|
| Grain Yield (GY)(kg/ha) | 70.30       | 0.36                    |
| Grain Protein (GP)(%)   | 12.48       | 0.26                    |
| Test Weight (TW)(g/l)   | 58.88       | 0.87                    |

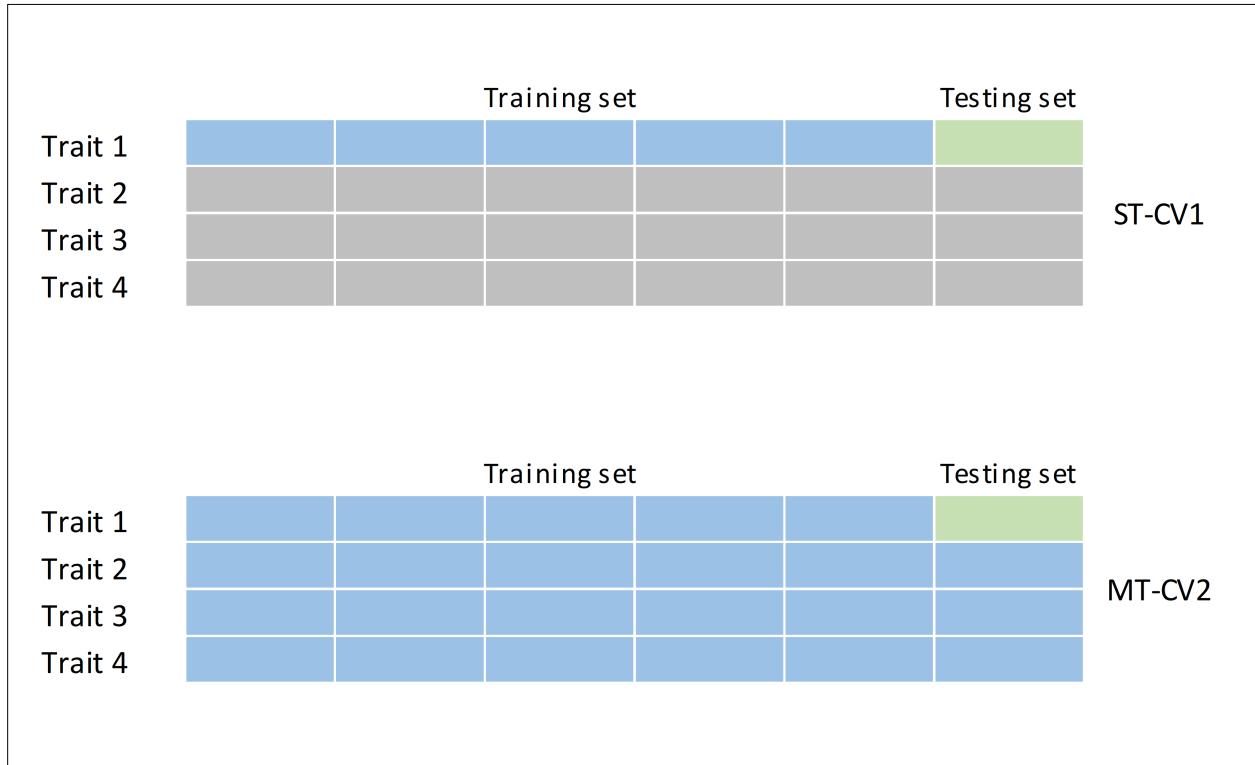

**Supplementary Figure 1. Prediction** accuracies were estimated for the single-trait (ST) model with cross-validation scheme 1 (ST-CV1) and multi-trait (MT) model with cross-validation scheme 2 (MT-CV2).

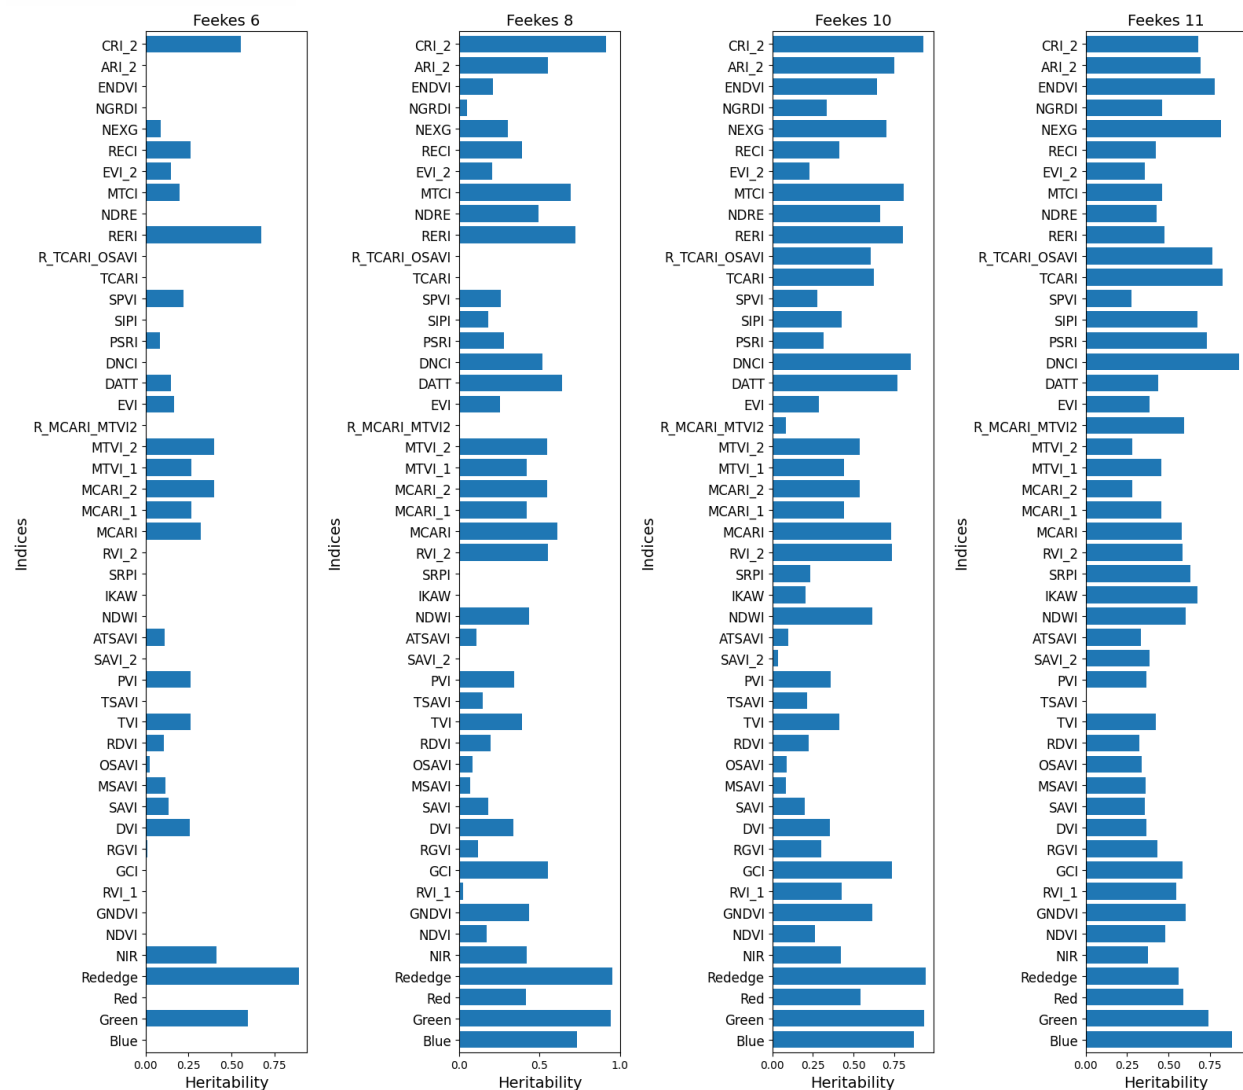

**Supplementary Figure 2.** Broad-sense heritability ( $H^2$ ) of High-Throughput Phenotyping (HTP) based traits across various growth stages (Feekes 6: jointing, Feekes 8: Flag leaf, Feekes 10: Booting, Feekes 11: Milk ripe).

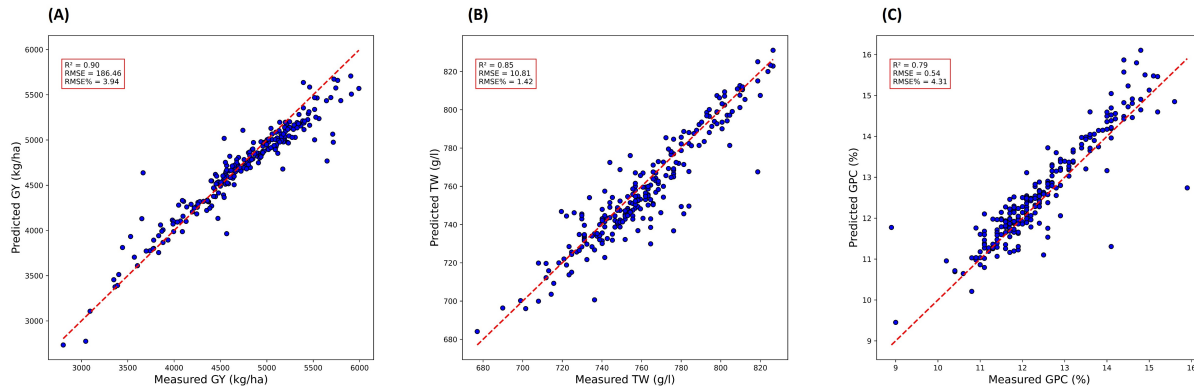

**Supplementary Figure 3.** Phenomic predictions for grain yield (GY), B) test weight (TW), and C) grain protein (GPC), using DNN with combined High-Throughput Phenotyping (HTP) based traits on the training set (70%) for ELITE and AYT at Brookings.



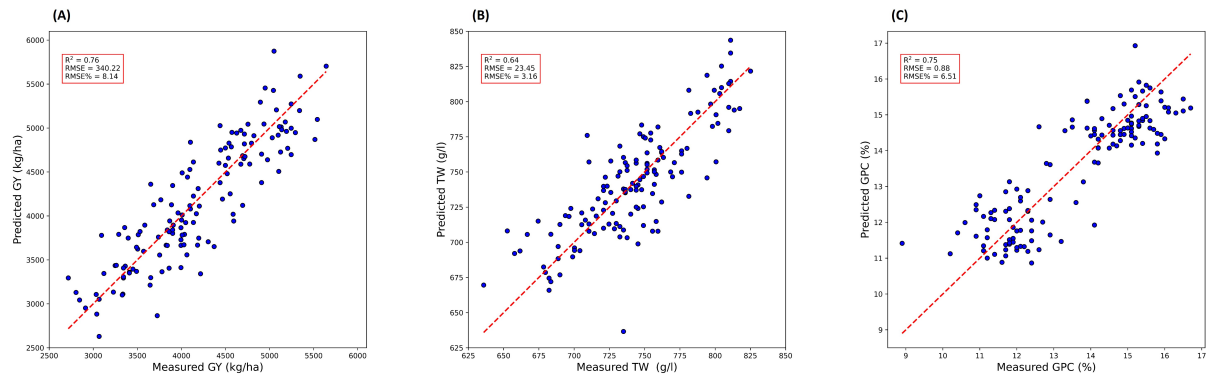

**Supplementary Figure 4.** A) Phenomic predictions for grain yield (GY), B) Test weight (TW), and C) grain protein content (GPC). Predictions were made on the testing set (30%) using DNN trained on ELITE and AYT at Brookings and Dakota Lakes (multi-locations).

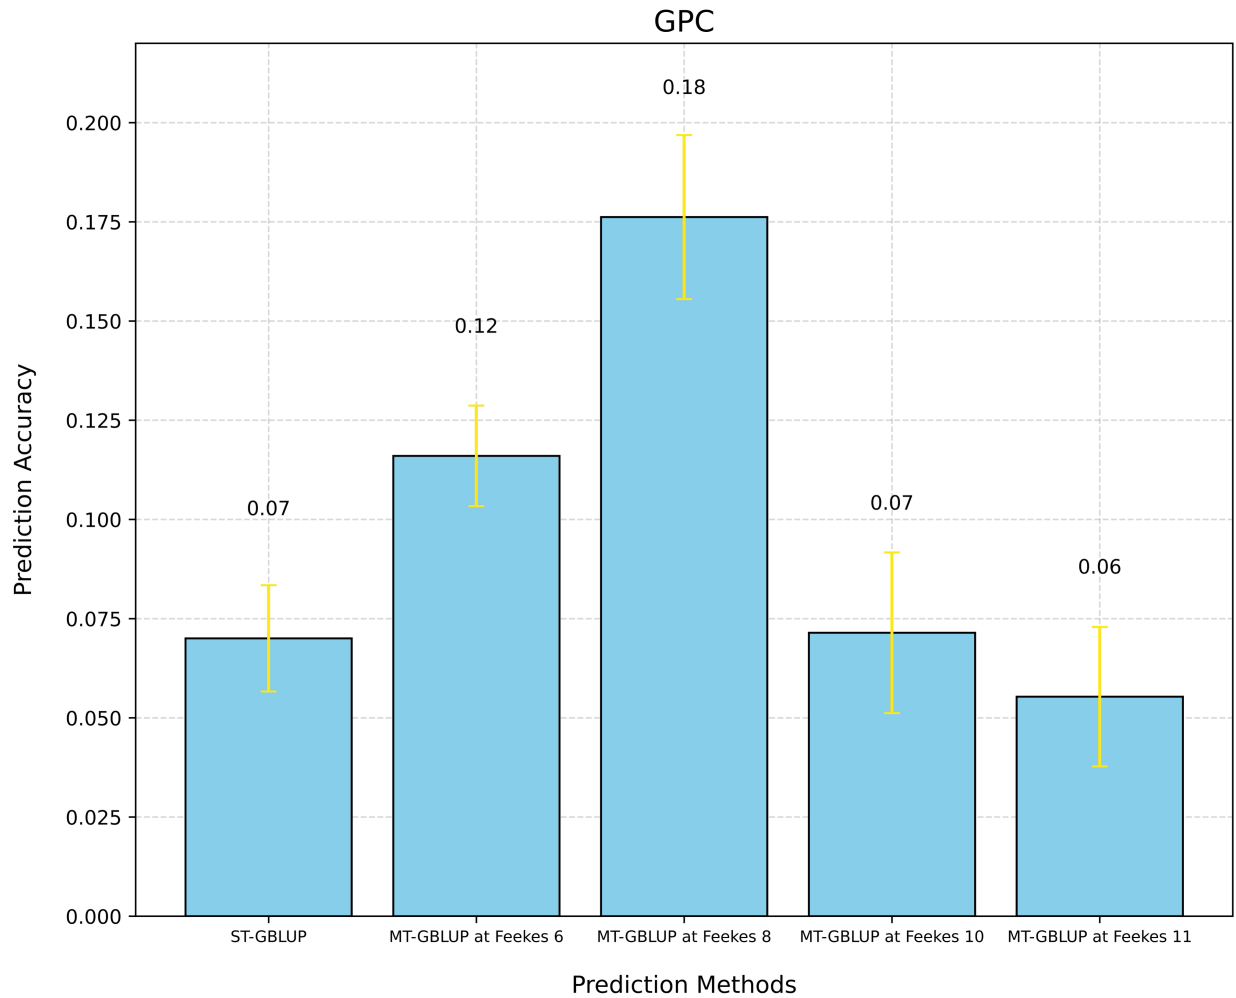

**Supplementary Figure 5.** Comparison of Prediction accuracy for Grain Protein (GPC) using Single-Trait GBLUP (ST-GBLUP) with cross-validation scheme ST-CV1 and Multi-Trait GBLUP (MT-GBLUP) incorporating High-Throughput Phenotyping (HTP) based traits with cross-validation scheme MT-CV2 across different growth stages (Feekes 6: jointing, Feekes 8: Flag leaf, Feekes 10: Booting, Feekes 11: Milk ripe).

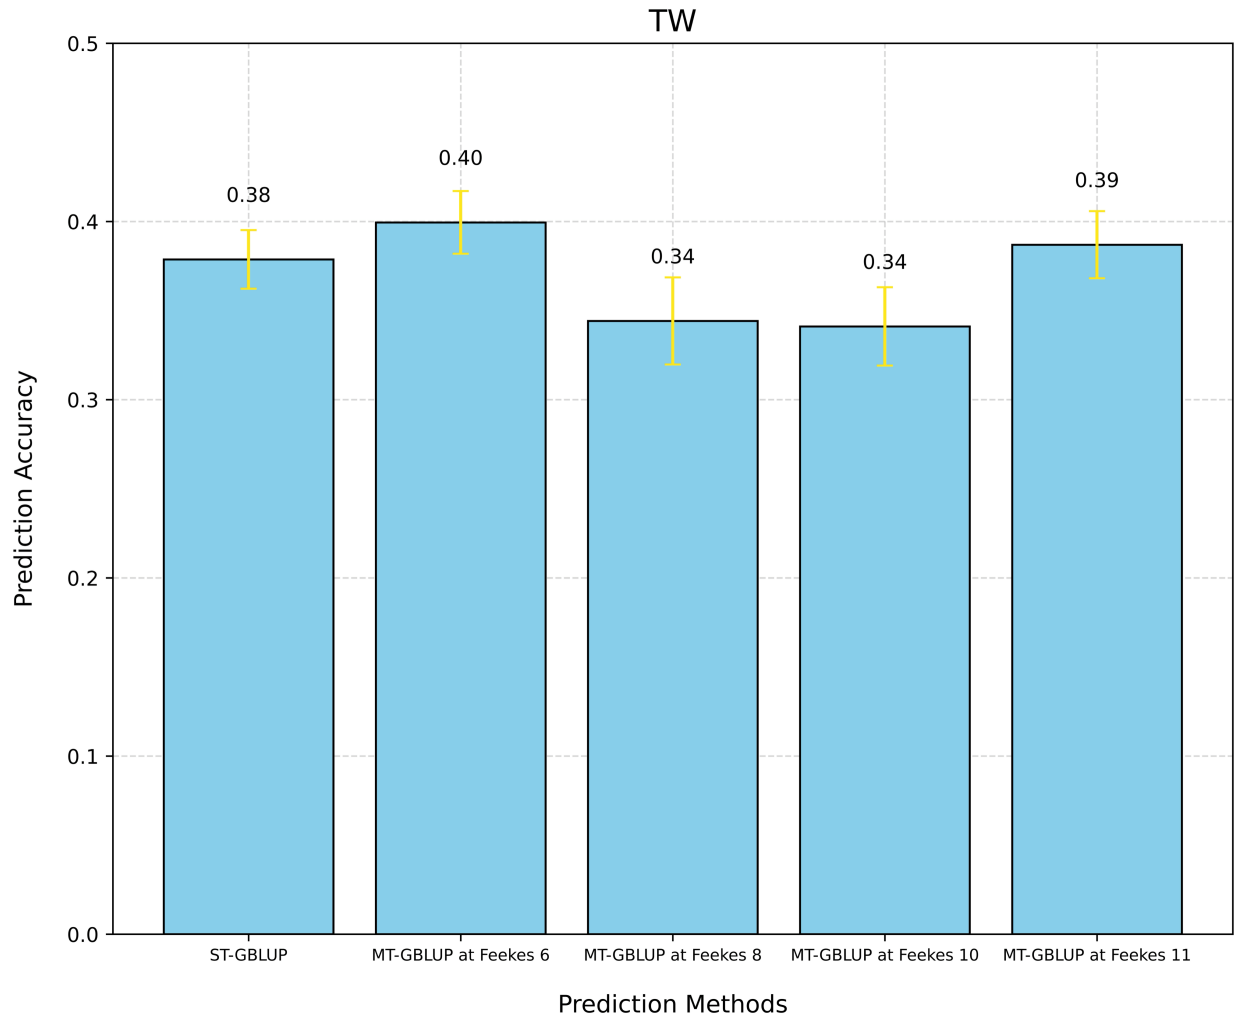

**Supplementary Figure 6.** Comparison of Prediction accuracy for Test Weight (TW) using Single-Trait GBLUP (ST-GBLUP) with cross-validation scheme ST-CV1 and Multi-Trait GBLUP (MT-GBLUP) High-Throughput Phenotyping (HTP) based traits with cross-validation scheme MT-CV2 across different growth stages (Feekes 6: jointing, Feekes 8: Flag leaf, Feekes 10: Booting, Feekes 11: Milk ripe).

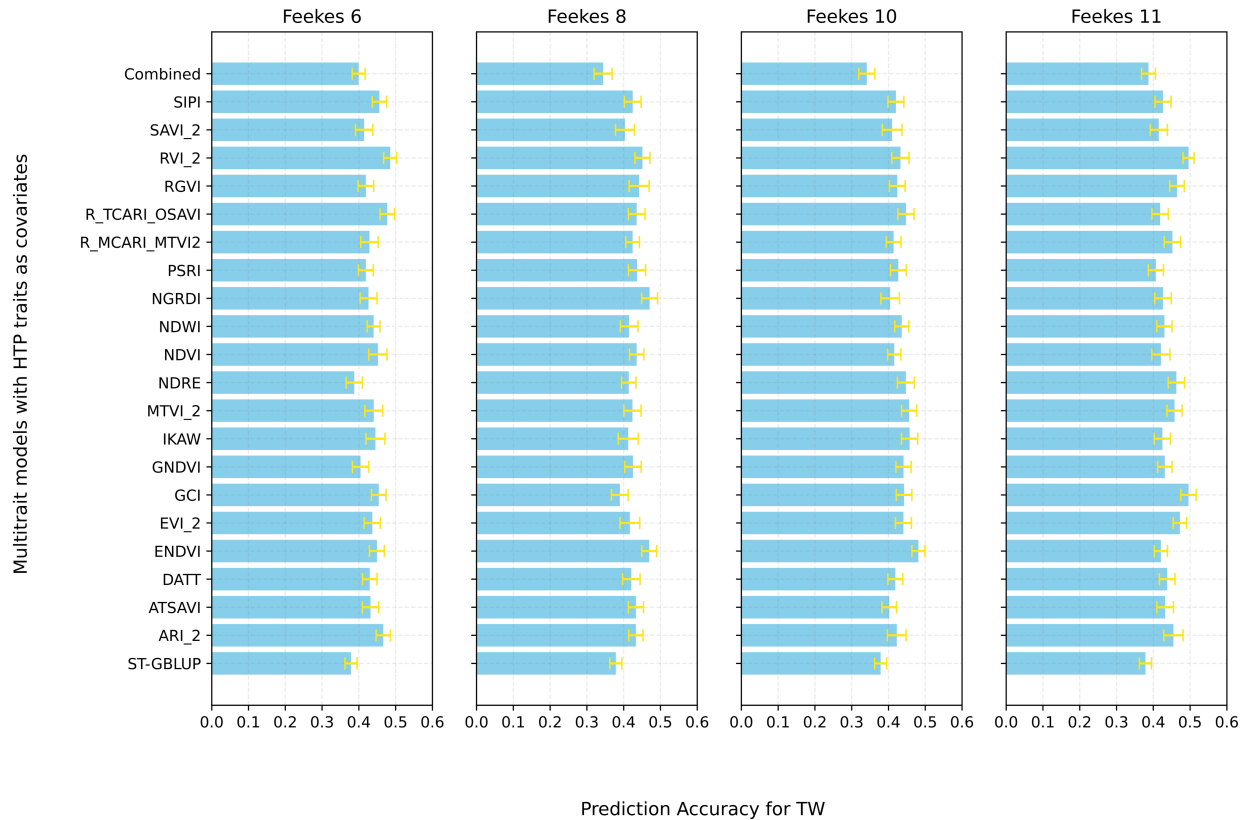

**Supplementary Figure 7.** Prediction accuracy for Test Weight (TW) using Single-Trait GBLUP (ST-GBLUP) with cross-validation scheme ST-CV1 and Multi-Trait GBLUP (MT-GBLUP) incorporating High-Throughput Phenotyping (HTP) based traits with cross-validation scheme MT-CV2 across different growth stages (Feekes 6: jointing, Feekes 8: Flag leaf, Feekes 10: Booting, Feekes 11: Milk ripe).

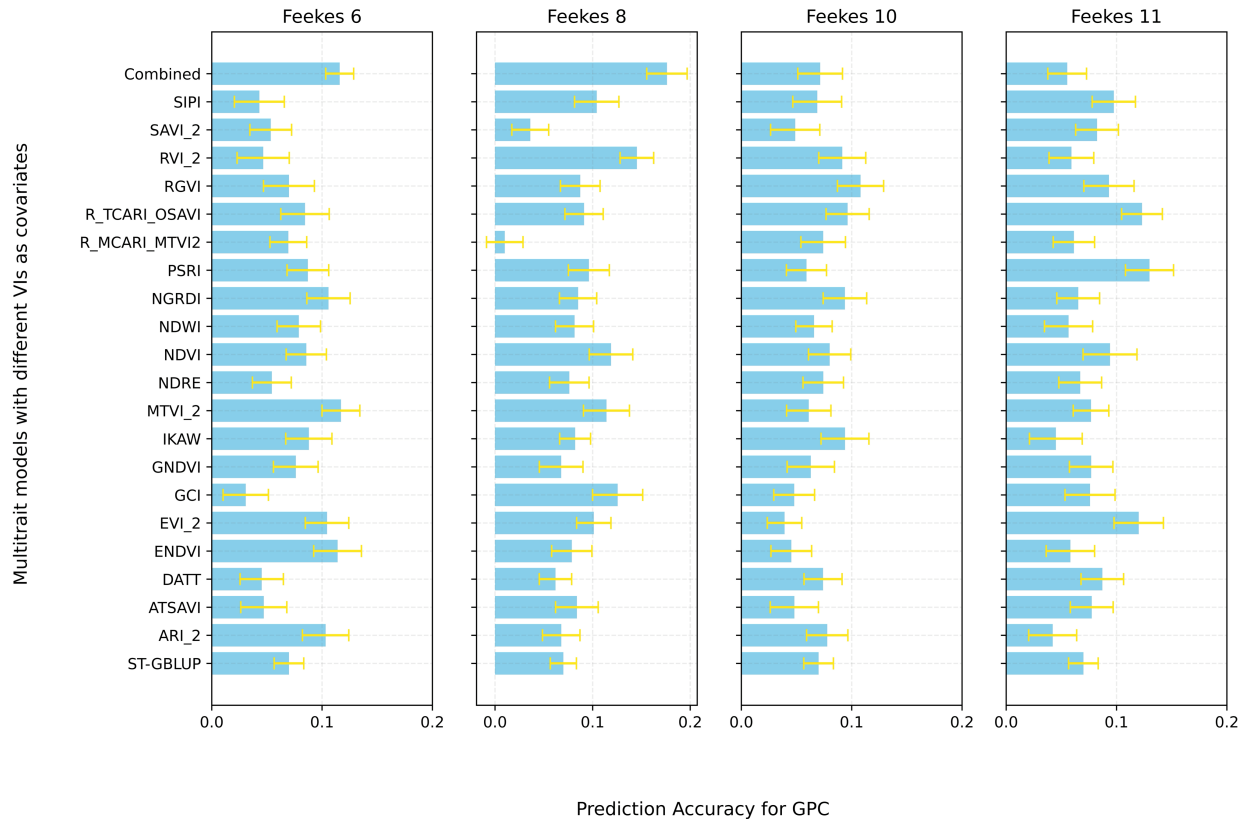

**Supplementary Figure 8.** Prediction accuracy for Grain Protein (GPC) using Single-Trait GBLUP (ST-GBLUP) with cross-validation scheme ST-CV1 and Multi-Trait GBLUP (MT-GBLUP) incorporating High-Throughput Phenotyping (HTP) based traits with cross-validation scheme MT-CV2 across different growth stages (Feekes 6: jointing, Feekes 8: Flag leaf, Feekes 10: Booting, Feekes 11: Milk ripe).

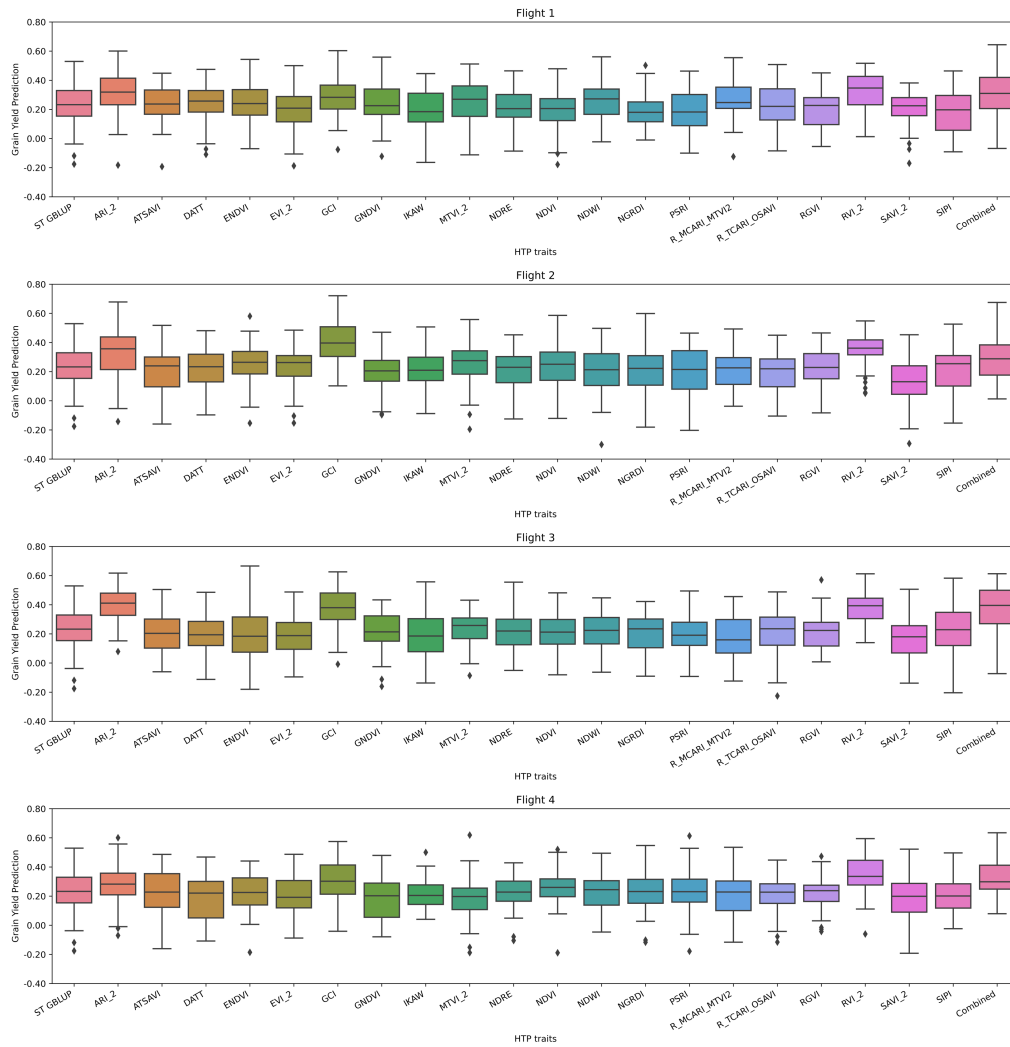

**Supplementary Figure 9.** Distribution of prediction accuracy estimates for Grain Yield (GY) across multiple repetitions using Single-Trait GBLUP (ST-GBLUP) with cross-validation scheme ST-CV1 and Multi-Trait GBLUP (MT-GBLUP) incorporating High-Throughput Phenotyping (HTP) based traits with cross-validation scheme MT-CV2 across flights. Each boxplot captures the variation in prediction accuracy across replicates for different prediction models.

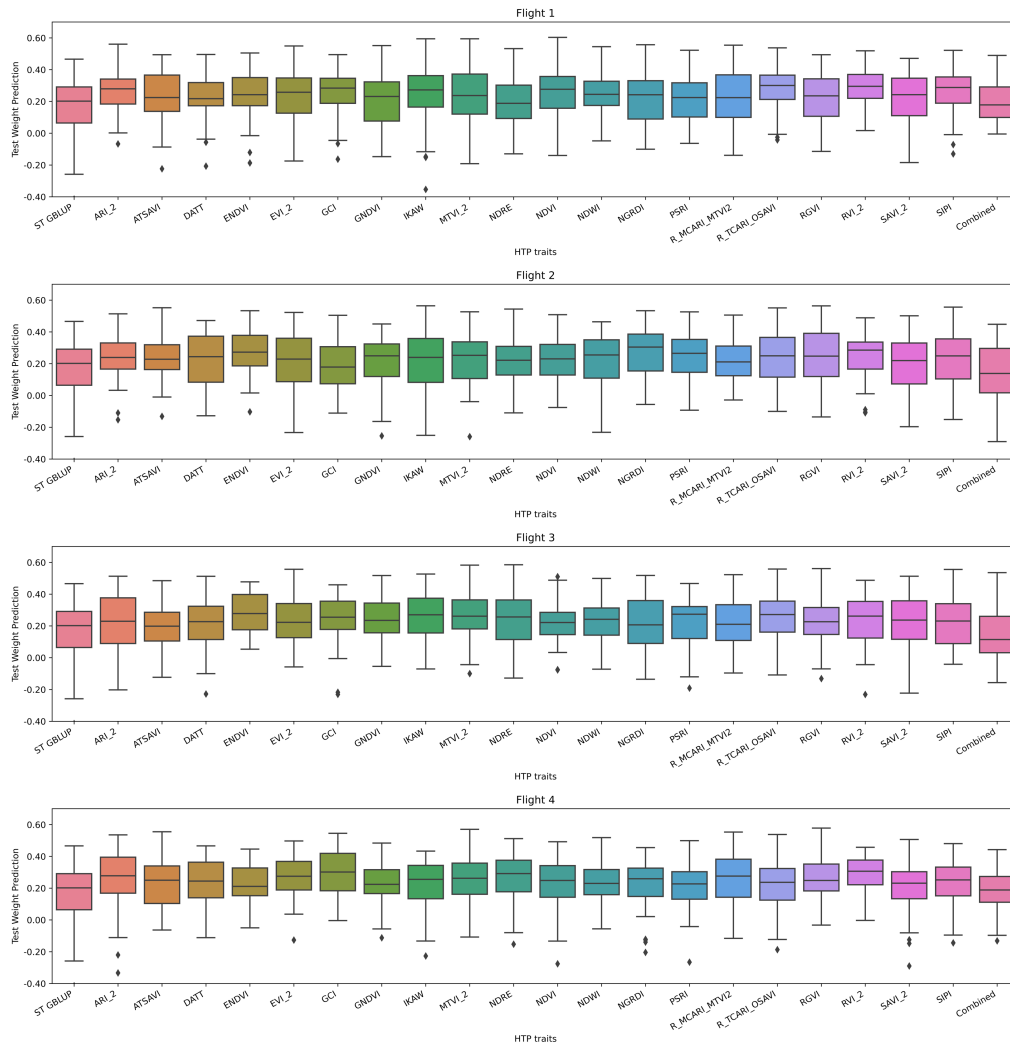

**Supplementary Figure 10.** Distribution of prediction accuracy estimates for Test Weight (TW) across multiple repetitions using Single-Trait GBLUP (ST-GBLUP) with cross-validation scheme ST-CV1 and Multi-Trait GBLUP (MT-GBLUP) incorporating High-Throughput Phenotyping (HTP) based traits with cross-validation scheme MT-CV2 across flights. Each boxplot captures the variation in prediction accuracy across replicates for different prediction models.

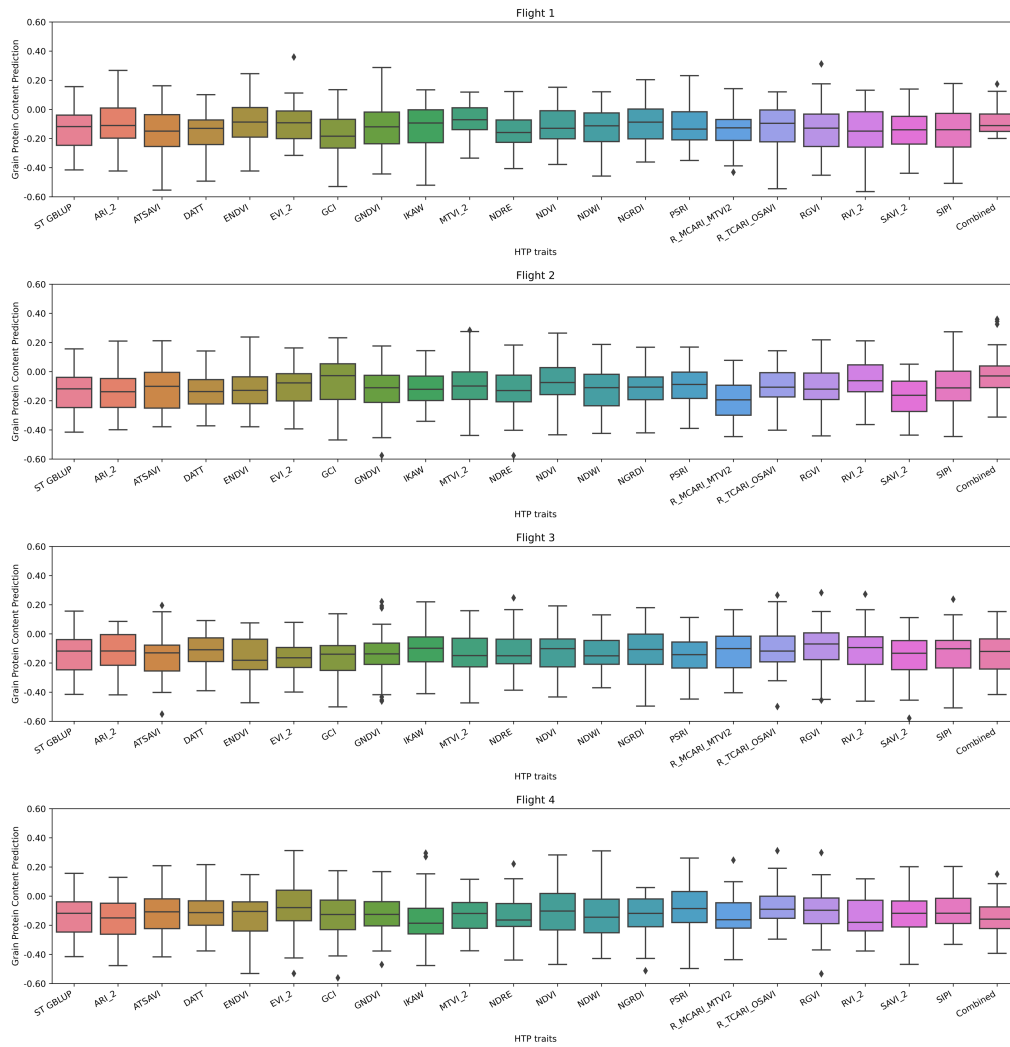

**Supplementary Figure 11.** Distribution of prediction accuracy estimates for Grain Protein Content (GPC) across multiple repetitions using Single-Trait GBLUP (ST-GBLUP) with cross-validation scheme ST-CV1 and Multi-Trait GBLUP (MT-GBLUP) incorporating High-Throughput Phenotyping (HTP) based traits with cross-validation scheme MT-CV2 across flights. Each boxplot captures the variation in prediction accuracy across replicates for different prediction models.



## REFERENCES

- Anchal, S., Bahuguna, S., Priti, Pal, P. K., Kumar, D., Murthy, P. S., & Kumar, A. (2022). Non-destructive method of biomass and nitrogen (N) level estimation in *Stevia rebaudiana* using various multispectral indices. *Geocarto International*, *37*(22), 6409-6421.
- Baret, F., & Guyot, G. (1991). Potentials and limits of vegetation indices for LAI and APAR assessment. *Remote sensing of environment*, *35*(2-3), 161-173.
- Chen, P., Haboudane, D., Tremblay, N., Wang, J., Vigneault, P., & Li, B. (2010). New spectral indicator assessing the efficiency of crop nitrogen treatment in corn and wheat. *Remote sensing of environment*, *114*(9), 1987-1997.
- Dash, J., & Curran, P. (2004). The MERIS terrestrial chlorophyll index.
- Datt, B. (1999). A new reflectance index for remote sensing of chlorophyll content in higher plants: tests using Eucalyptus leaves. *Journal of plant physiology*, *154*(1), 30-36.
- Daughtry, C. S., Walthall, C., Kim, M., De Colstoun, E. B., & McMurtrey Iii, J. (2000). Estimating corn leaf chlorophyll concentration from leaf and canopy reflectance. *Remote sensing of environment*, *74*(2), 229-239.
- Deering, D. (1975). Measuring "forage production" of grazing units from Landsat MSS data. Proceedings of the Tenth International Symposium of Remote Sensing of the Environment,
- Eitel, J., Long, D., Gessler, P., & Smith, A. (2007). Using in-situ measurements to evaluate the new RapidEye™ satellite series for prediction of wheat nitrogen status. *International Journal of Remote Sensing*, *28*(18), 4183-4190.
- Fitzgerald, G., Rodriguez, D., & O'Leary, G. (2010). Measuring and predicting canopy nitrogen nutrition in wheat using a spectral index—The canopy chlorophyll content index (CCCI). *Field crops research*, *116*(3), 318-324.
- Gitelson, A. A., Gritz, Y., & Merzlyak, M. N. (2003). Relationships between leaf chlorophyll content and spectral reflectance and algorithms for non-destructive chlorophyll assessment in higher plant leaves. *Journal of plant physiology*, *160*(3), 271-282.
- Gitelson, A. A., & Merzlyak, M. N. (1997). Remote estimation of chlorophyll content in higher plant leaves. *International Journal of Remote Sensing*, *18*(12), 2691-2697.
- Gitelson, A. A., Merzlyak, M. N., & Chivkunova, O. B. (2001). Optical properties and nondestructive estimation of anthocyanin content in plant leaves. *Photochemistry and photobiology*, *74*(1), 38-45.
- Haboudane, D., Miller, J. R., Pattey, E., Zarco-Tejada, P. J., & Strachan, I. B. (2004). Hyperspectral vegetation indices and novel algorithms for predicting green LAI of crop canopies: Modeling and validation in the context of precision agriculture. *Remote sensing of environment*, *90*(3), 337-352.
- Haboudane, D., Miller, J. R., Tremblay, N., Zarco-Tejada, P. J., & Dextraze, L. (2002). Integrated narrow-band vegetation indices for prediction of crop chlorophyll content for application to precision agriculture. *Remote sensing of environment*, *81*(2-3), 416-426.
- Huete, A., Liu, H., Batchily, K., & Van Leeuwen, W. (1997). A comparison of vegetation indices over a global set of TM images for EOS-MODIS. *Remote sensing of environment*, *59*(3), 440-451.
- Huete, A. R. (1988). A soil-adjusted vegetation index (SAVI). *Remote sensing of environment*, *25*(3), 295-309.
- Kawashima, S., & Nakatani, M. (1998). An algorithm for estimating chlorophyll content in leaves using a video camera. *Annals of Botany*, *81*(1), 49-54.

- McFeeters, S. K. (1996). The use of the Normalized Difference Water Index (NDWI) in the delineation of open water features. *International Journal of Remote Sensing*, 17(7), 1425-1432.
- Merzlyak, M. N., Gitelson, A. A., Chivkunova, O. B., & Rakitin, V. Y. (1999). Non-destructive optical detection of pigment changes during leaf senescence and fruit ripening. *Physiologia plantarum*, 106(1), 135-141.
- Nuarsa, I. W., Nishio, F., & Hongo, C. (2011). Relationship between rice spectral and rice yield using MODIS data. *Journal of Agricultural Science*, 3(2), 80.
- Pearson, R. L., & Miller, L. D. (1972). Remote mapping of standing crop biomass for estimation of the productivity of the shortgrass prairie. *Remote sensing of environment*, VIII, 1355.
- Peñuelas, J., Filella, I., & Gamon, J. A. (1995). Assessment of photosynthetic radiation-use efficiency with spectral reflectance. *New Phytologist*, 131(3), 291-296.
- Qi, J., Chehbouni, A., Huete, A. R., Kerr, Y. H., & Sorooshian, S. (1994). A modified soil adjusted vegetation index. *Remote sensing of environment*, 48(2), 119-126.
- Richardson, A. J., & Wiegand, C. (1977). Distinguishing vegetation from soil background information. *Photogrammetric engineering and remote sensing*, 43(12), 1541-1552.
- Rondeaux, G., Steven, M., & Baret, F. (1996). Optimization of soil-adjusted vegetation indices. *Remote sensing of environment*, 55(2), 95-107.
- Roujean, J.-L., & Breon, F.-M. (1995). Estimating PAR absorbed by vegetation from bidirectional reflectance measurements. *Remote sensing of environment*, 51(3), 375-384.
- Rouse Jr, J., Haas, R. H., Deering, D., Schell, J., & Harlan, J. C. (1974). *Monitoring the vernal advancement and retrogradation (green wave effect) of natural vegetation*.
- Tucker, C. J. (1979). Red and photographic infrared linear combinations for monitoring vegetation. *Remote sensing of environment*, 8(2), 127-150.
- Vincini, M., Frazzi, E., & D'Alessio, P. (2006). Angular dependence of maize and sugar beet VIs from directional CHRIS/Proba data. Proc. 4th ESA CHRIS PROBA Workshop,
- Woebbecke, D. M., Meyer, G. E., Von Bargen, K., & Mortensen, D. A. (1995). Color indices for weed identification under various soil, residue, and lighting conditions. *Transactions of the ASAE*, 38(1), 259-269.
